# Supplementary material for: Protection of lead-induced cytotoxicity using paramagnetic nickel–insulin quantum clusters
Source: Royal Society of Chemistry journal article supplement (doi:10.1039/d1ra03597e), 2021-01-01
Supplement: d1ra03597e1.pdf [file d1ra03597e1.pdf]

### Protection of lead-induced cytotoxicity using paramagnetic Nickel-Insulin quantum clusters.

Deepinder Sharda<sup>1</sup>, Komal Attri<sup>1,2</sup>, Pawandeep Kaur<sup>1</sup>, Diptiman Choudhury<sup>1,2,\*</sup>

<sup>1</sup>School of Chemistry and Biochemistry, Thapar Institute of Engineering and Technology, Patiala, 147004, Punjab, India.

<sup>2</sup>Thapar Institute of Engineering and Technology-Virginia Tech (USA) Center for Excellence and Material Sciences, Thapar Institute of Engineering and Technology, Patiala, Punjab- 147004, India.

Corresponding email: [diptiman@thapar.edu](mailto:diptiman@thapar.edu), Phone: +91-8196949843.

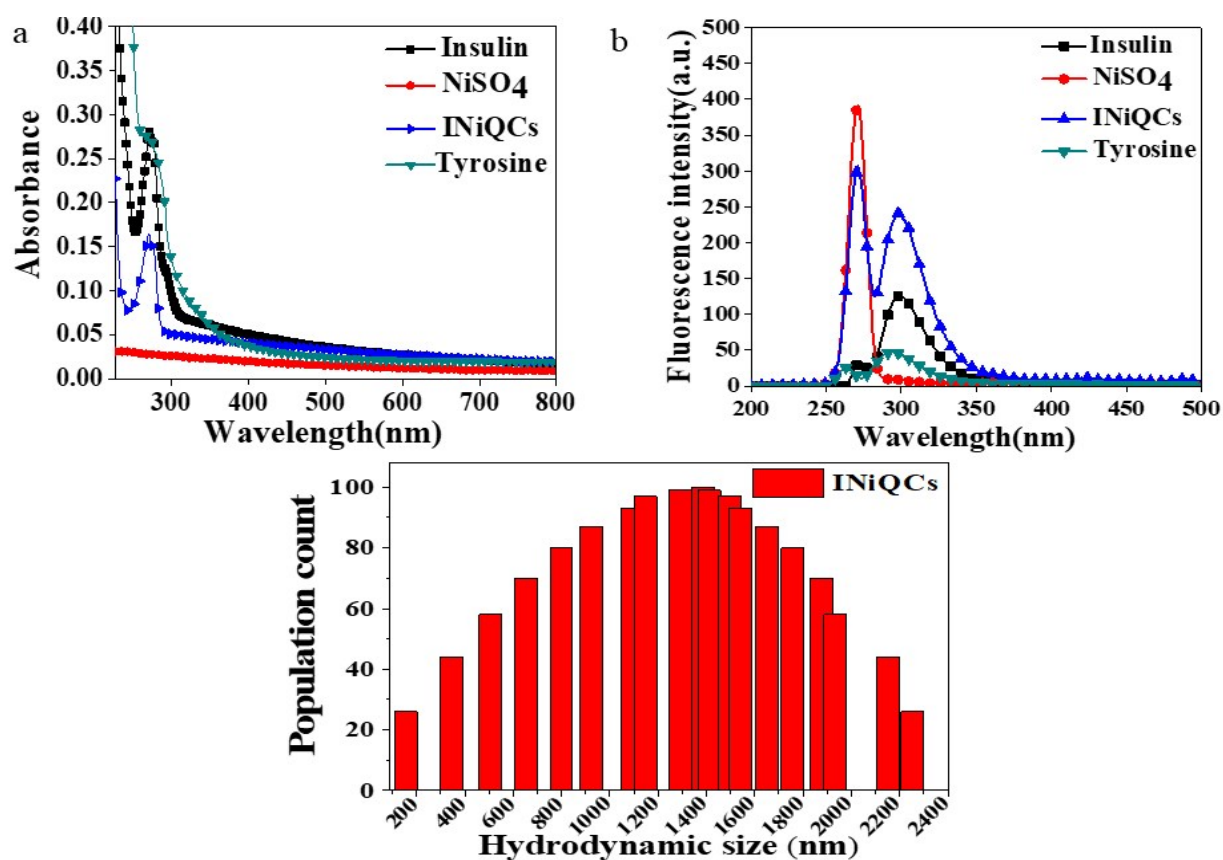

**Fig. S1 Spectroscopic characterization of INiQCs** (a) It shows a comparison of absorbance value between Insulin, INiQCs, NiSO<sub>4</sub>, and tyrosine (standard). (b) It shows a comparison of the fluorescence intensity value of Insulin, INiQCs, NiSO<sub>4</sub>, and tyrosine (standard). (c) The hydrodynamic size of

INiQCs was found to be  $1400 \pm 150$  nm.

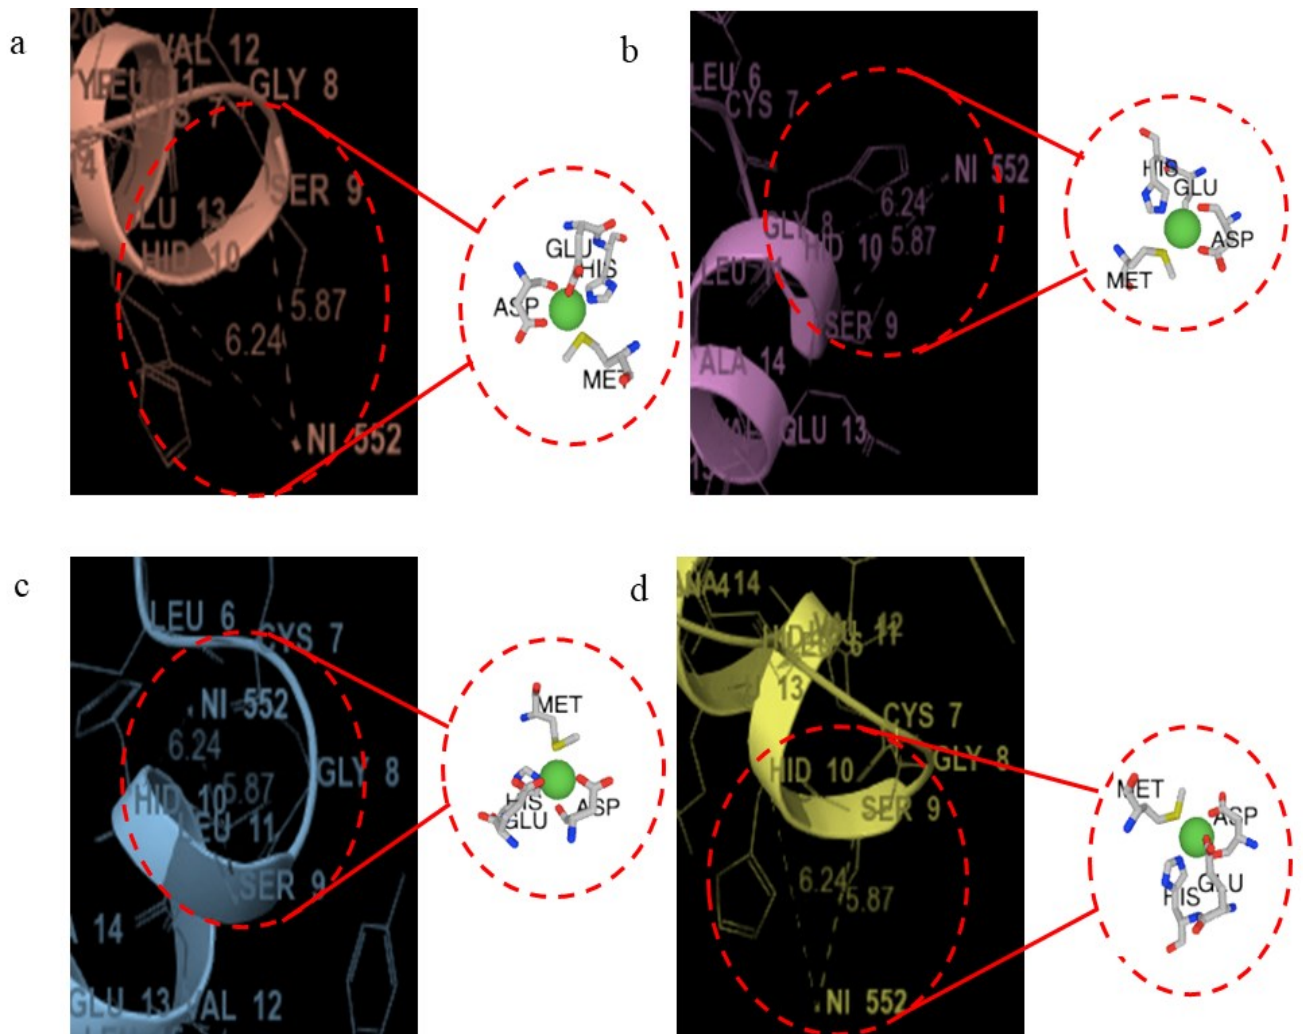

**Fig. S2 MIB docking for the interaction of nickel with insulin protein.** (a, b, c, and d) Metal ion binding residues: Depicts the binding site for Ni with the amino acid residues within 3.55 Å diameter that can participate in binding on chain B of insulin in 4 different orientations. It shows the distance between different functional groups and Ni<sup>2+</sup> ions.

**Table ST1.** It shows the binding score for different amino acids present in chain B of insulin with Ni<sup>2+</sup> ion. Here the binding score is maximum for SER and HIS amino acids.

| Residue Number | Amino Acid | Score  |
|----------------|------------|--------|
| 1              | PHE        | -0.899 |
| 2              | VAL        | -0.899 |
| 3              | ASN        | 0.617  |
| 4              | GLN        | 1.557  |
| 5              | HIS        | 1.557  |
| 6              | LEU        | 0.821  |
| 7              | CYS        | 1.471  |
| 8              | GLY        | 0.912  |
| 9              | SER        | 2.103  |
| 10             | HIS        | 2.103  |
| 11             | LEU        | 0.630  |
| 12             | VAL        | -0.899 |
| 13             | GLU        | -0.899 |
| 14             | ALA        | 0.726  |
| 15             | LEU        | -0.176 |
| 16             | TYR        | -0.899 |
| 17             | LEU        | -0.899 |
| 18             | VAL        | -0.899 |
| 19             | CYS        | 0.416  |
| 20             | GLY        | 0.625  |
| 21             | GLU        | 0.625  |
| 22             | ARG        | -0.899 |
| 23             | GLY        | -0.264 |
| 24             | PHE        | 0.096  |
| 25             | PHE        | -0.899 |
| 26             | TYR        | -0.899 |
| 27             | THR        | -0.899 |
| 28             | PRO        | -0.899 |
| 29             | LYS        | -0.899 |
| 30             | THR        | -0.899 |

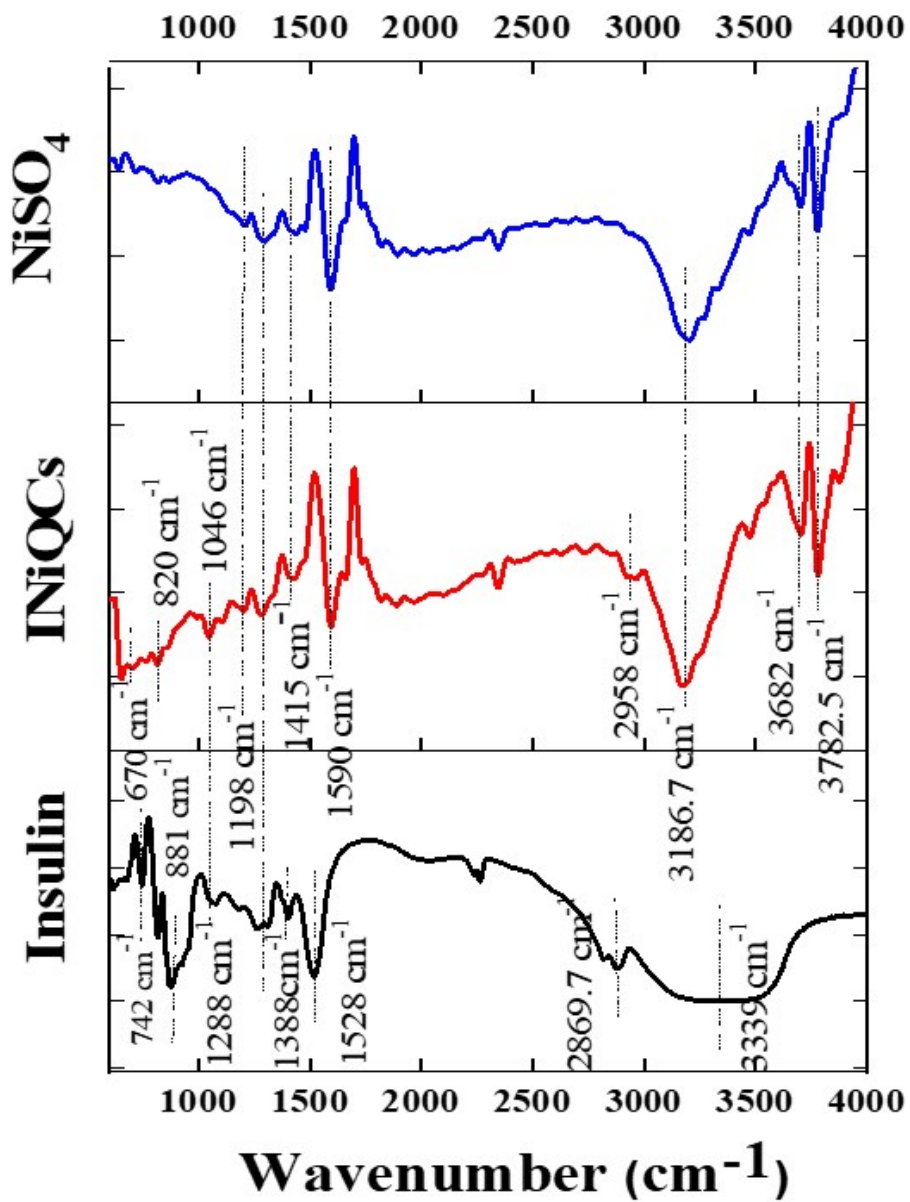

**Fig. S3. FTIR spectroscopic studies to find the interaction between insulin protein and nickel-metal ion.** The comparison shows the formation of new bonds between Ni-OH and Ni=O, which were otherwise not present.

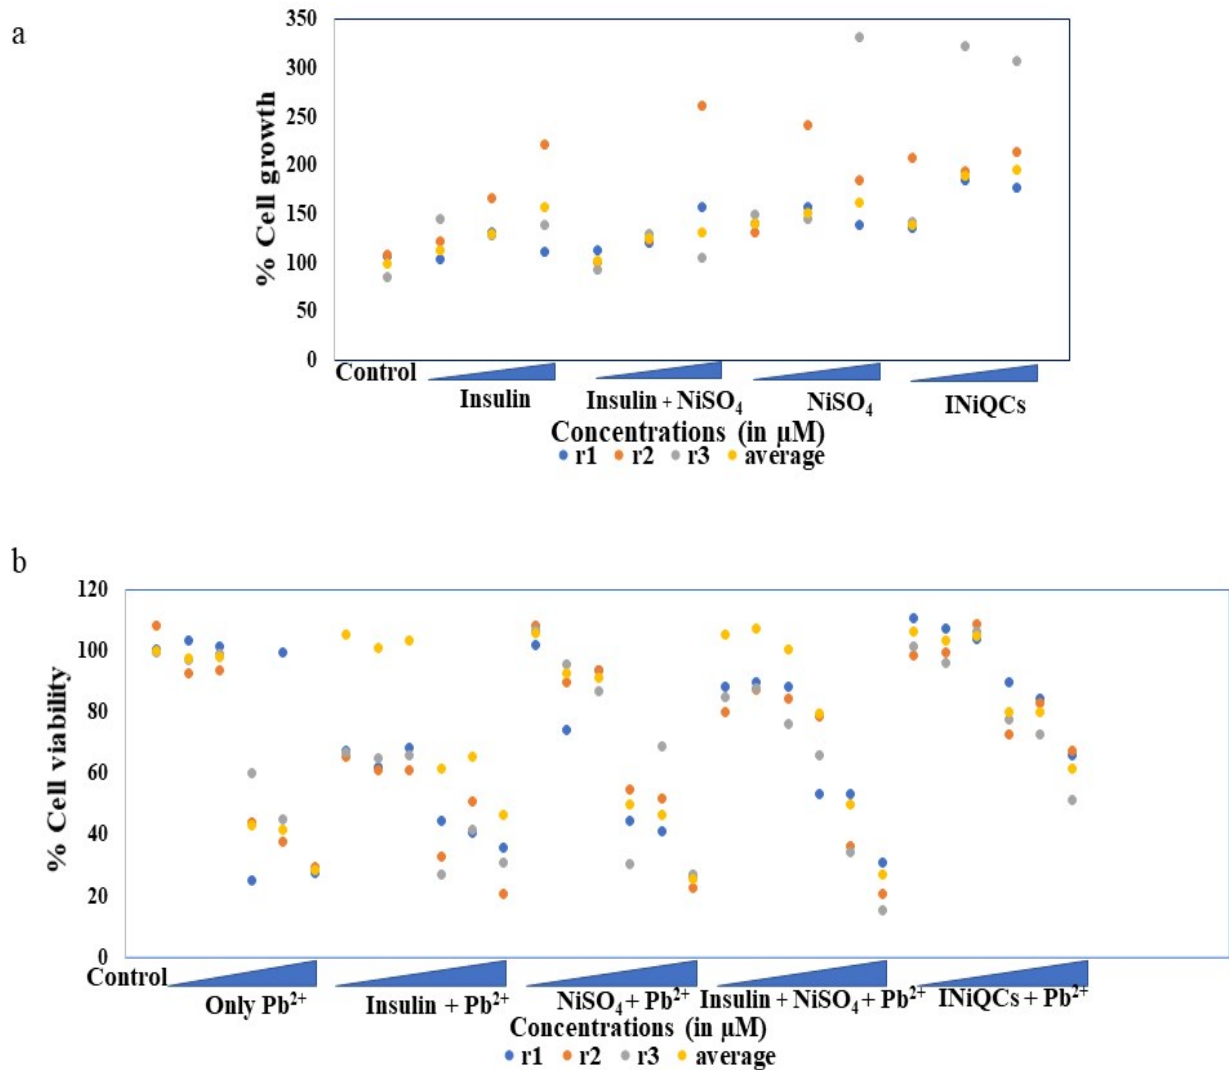

**Fig. S4.** It represents an MTT assay to determine the metabolism rate of cells. (a) Data shows treatment of HEK-293 cells with control, including insulin, NiSO<sub>4</sub>, insulin + NiSO<sub>4</sub>, and INiQCs ranging from 1.5, 7.5, and 30  $\mu\text{M}$  concentrations, respectively, of each sample. (b) Data shows treatment of HEK-293 cells with 0.45  $\mu\text{M}$  of insulin, NiSO<sub>4</sub>, insulin + NiSO<sub>4</sub>, and INiQCs. Then the same cells were treated with 0, 1, 10, 100, 500, 1000 ( $\mu\text{M}$ ) concentration of Pb<sup>2+</sup> after 3 h, and data were plotted using individual readings rather than non-descriptive error bars. Here r1, r2, and r3 in both the figures represent three individual readings taken for MTT assay after normalizing to control.
